# Supplementary material for: Fault “Corrosion” by Fluid Injection: A Potential Cause of the November 2017 MW 5.5 Korean Earthquake
Source: Hindawi journal article supplement (doi:10.1155/2019/1280721), 2019-07-24
Supplement: f1 [file 1280721.f1.xlsx]

## Sheet: Field_data
Data S1:		Water samples - field data
??????????????????????????????????????????????????????????????????????????????????????????????????????????????????????????????????????????????????????????????????????????????
Sample	Collection			Ultrameter						Rig crew		Orion Star
	??????????????	??????????????????????????????????????										????????????
	Date	Time		T (°C)	pH	EC (µS/cm)	TDS (ppm)	ORP (mV)		T (°C)		EC (µS/cm)	pH		Note	Description
??????????????????????????????????????????????????????????????????????????????????????????????????????????????????????????????????????????????????????????????????????????????
SK01	2017-08-03	12:00:00		28.6	6.13	978.5	677.1	174		ND		ND	ND			Irrigation pond water, for injection into well PX-1, sampled from side of pond opposite pump house.
SK02	2017-08-03	12:30:00		33.7	6.54	903.2	615.9	159		ND		ND	ND			Irrigation pond water, for injection into well PX-1, sampled at the pump house
SK03	2017-08-03	13:00:00		31.8	6.48	896.6	612.6	173		ND		ND	ND			Irrigation pond water, for injection into well PX-1, sampled east of the pump house
SK04	2017-08-04	11:00:00		23.8	8.37	874.4	608.5	174		ND		ND	ND			Groundwater supply to site buildings
SK05	2017-03-29	17:20:00		24.6	8.11	2634	1962	88		ND		ND	ND		1	Well PX-2. Water bled off before its April 2017 stimulation.
SK06	2017-04-10	17:45:00		24.4	8.38	1110	777.9	107		ND		ND	ND		1	Well PX-2. Water bled off before its April 2017 stimulation.
SK07	2017-04-17	00:35:00		24.3	7.91	2911	2173	130		ND		ND	ND		1	Well PX-2. Water bled off after its April 2017 stimulation.
SK08	2017-05-03	19:15:00		24.2	7.71	6562	6268	152		ND		ND	ND		1	Well PX-2. Water bled off after its April 2017 stimulation.
SK09	2017-04-17	00:29:00		26.8	7.54	3674	2779	224		ND		ND	ND		1	Well PX-1. Water bled off after the April 2017 stimulation of well PX-1.
SK10	2017-08-01	09:30:00		24.8	7.42	3643	2761	-147		ND		ND	ND		1	Well PX-1. Water produced during air lift test before August 2017 stimulation.
SK11	2017-08-02	11:30:00		25.6	7.48	3995	3051	30		ND		ND	ND		1	Well PX-1. Water produced during air lift test before August 2017 stimulation.
SK12	2017-08-02	17:00:00		25.2	7.6	3969	3931	-36		ND		ND	ND		1	Well PX-1. Water produced during air lift test before August 2017 stimulation.
SK13	2017-08-03	19:00:00		25.2	7.33	4280	3301	69		ND		ND	ND		1	Well PX-1. Water produced during air lift test before August 2017 stimulation.
SK14	2017-03-17	12:55:00		25.4	8.16	3415	2576	86		ND		ND	ND		1	Well PX-2. Water bled off before its April 2017 stimulation.
SK15	2017-01-17	22:44:00		25.4	7.69	3711	2817	102		ND		ND	ND		1	Well PX-2. Water bled off after the December 2016 / January 2017 stimulation of well PX-1.
SK16	2017-03-16	ND		25.4	7.39	10750	9103	122		ND		ND	ND		1	Well PX-2. Water bled off before its April 2017 stimulation.
SK17	2016-12-23	08:00:00		25	7.42	956.7	664.9	160		ND		ND	ND		1	Well PX-1. Water bled off before its December 2016 / January 2017 stimulation.
SK18	2016-12-24	19:43:00		25.2	7.62	2006	1462	239		ND		ND	ND		1	Well PX-1. Water bled off before its December 2016 / January 2017 stimulation.
SK19	2017-03-20	17:20:00		24.9	7.37	3963	3029	-179		ND		ND	ND		1	Well PX-1. Water bled off before the April 2017 stimulation of well PX-2.
SK20	2017-08-07	11:30:00		29.5	7.4	1322	923.1	4		ND		ND	ND			Injection water from pond, sampled after the inlet filter, before injection into well PX-1.
SK21	2017-08-07	12:30:00		29.6	6.53	989.1	684.9	188		ND		ND	ND			Injection water from pond, sampled before the inlet filter, before injection into well PX-1.
SK22	2017-08-14	09:55:00		29.6	IC	2037	1474	IC		ND		1370	7.31			Well PX-1. Water produced during post-injection flowback, sampled at outlet to mud tank.
SK23	2017-08-14	11:10:00		32.6	IC	967.2	662.9	IC		ND		1113	7.64			Well PX-1. Water produced during post-injection flowback, sampled at outlet to mud tank.
SK24	2017-08-14	13:30:00		47.6	IC	1273	868.1	IC		ND		1428	7.56			Well PX-1. Water produced during post-injection flowback, sampled at outlet to mud tank.
SK25	2017-08-14	15:40:00		53	IC	1400	947	IC		ND		1555	7.35			Well PX-1. Water produced during post-injection flowback, sampled at outlet to mud tank.
SK26	2017-08-14	17:40:00		57.3	IC	1563	1074	IC		ND		2025	7.29			Well PX-1. Water produced during post-injection flowback, sampled at outlet to mud tank.
SK27	2017-08-14	19:00:00		55.3	IC	1674	1142	IC		62		1861	7.24			Well PX-1. Water produced during post-injection flowback, sampled at outlet to mud tank.
SK28	2017-08-14	21:00:00		53	IC	1804	1268	IC		59.5		2022	7.23			Well PX-1. Water produced during post-injection flowback, sampled at outlet to mud tank.
SK29	2017-08-14	23:00:00		54.6	IC	1917	1335	IC		59.7		2203	7.02			Well PX-1. Water produced during post-injection flowback, sampled at outlet to mud tank.
SK30	2017-08-15	01:00:00		55.2	IC	1998	1406	IC		59.4		2281	6.87			Well PX-1. Water produced during post-injection flowback, sampled at outlet to mud tank.
SK31	2017-08-15	03:00:00		51.6	IC	2057	1459	IC		52		2364	7.08			Well PX-1. Water produced during post-injection flowback, sampled at outlet to mud tank.
SK32	2017-08-15	05:00:00		54	IC	2160	1494	IC		59.5		2461	6.59			Well PX-1. Water produced during post-injection flowback, sampled at outlet to mud tank.
SK33	2017-08-15	07:15:00		59.3	IC	2311	1622	IC		63.9		2670	6.86			Well PX-1. Water produced during post-injection flowback, sampled at outlet to mud tank.
SK34	2017-08-15	10:00:00		58.1	7.09	2596	1842	-127		ND		2745	6.85			Well PX-1. Water produced during post-injection flowback, sampled at outlet to mud tank.
SK35	2017-08-15	13:00:00		58.5	7.11	2465	1750	-123		ND		3223	6.97			Well PX-1. Water produced during post-injection flowback, sampled at outlet to mud tank.
SK36	2017-08-15	16:00:00		58.7	7.12	2524	1800	-144		64		3016	7.09			Well PX-1. Water produced during post-injection flowback, sampled at outlet to mud tank.
SK37	2017-08-15	18:45:00		58.2	7.13	2591	1854	-139		ND		2975	7.06			Well PX-1. Water produced during post-injection flowback, sampled at outlet to mud tank.
SK38	2017-08-16	09:30:00		51.2	7.08	2843	2041	-136		ND		3305	7.02			Well PX-1. Water produced during post-injection flowback, sampled at outlet to mud tank.
SK39	2017-08-16	12:25:00		53.5	7.1	2860	2060	-155		ND		3248	7.05			Well PX-1. Water produced during post-injection flowback, sampled at outlet to mud tank.
SK40	2017-08-16	19:00:00		54.5	7.14	2901	2100	-159		ND		3261	7.18			Well PX-1. Water produced during post-injection flowback, sampled at outlet to mud tank.
SK41	2017-08-17	12:45:00		51.2	7.1	3023	2175	-140		65		3465	7.01			Well PX-1. Water produced during post-injection flowback, sampled at wellhead.
SK42	2017-08-17	18:00:00		52.3	7.14	3053	2200	-152		ND		3508	7.01			Well PX-1. Water produced during post-injection flowback, sampled from valve in the casing cutter housing pipe.
SK43	2017-08-18	09:07:00		46.9	7.16	3110	2253	-140		59		3643	7.25			Well PX-1. Water produced during post-injection flowback, sampled from valve in the casing cutter housing pipe.
SK44	2017-08-18	18:06:00		ND	7.05	3141	2282	-151		55		3800	6.91			Well PX-1. Water produced during post-injection flowback, sampled from valve in the casing cutter housing pipe.
SK45	2017-08-19	10:10:00		41.8	7.22	3103	2331	-184		ND		3635	7.1			Well PX-1. Water produced during post-injection flowback, sampled at wellhead.
SK46	2017-08-20	16:50:00		39.3	7.23	3229	2368	-183		47		3706	7.07			Well PX-1. Water produced during post-injection flowback, sampled at wellhead.
SK47	2017-08-25	ND		ND	7.02	3080	2389	265		ND		ND	ND		2	Well PX-1. Water produced during 500 m pumping test.
SK48	2017-08-26	ND		ND	6.89	3565	2811	251		ND		ND	ND		2	Well PX-1. Water produced during 500 m pumping test.
SK49	2017-08-27	ND		ND	6.88	3495	2743	237		ND		ND	ND		2	Well PX-1. Water produced during 500 m pumping test.
SK50	2017-08-31	ND		ND	7.01	3417	2694	223		ND		ND	ND		2	Well PX-1. Water produced during 500 m pumping test.
SK51	2017-09-01	ND		ND	6.95	3584	2829	218		ND		ND	ND		2	Well PX-1. Water produced during 500 m pumping test.
SK52	2017-08-27	ND		ND	6.9	12370	10930	215		ND		ND	ND		2	Well PX-2. Water produced during 500 m pumping test in well PX-1.
SK53	2017-08-28	ND		ND	7.03	12400	11030	209		ND		ND	ND		2	Well PX-2. Water produced during 500 m pumping test in well PX-1.
??????????????????????????????????????????????????????????????????????????????????????????????????????????????????????????????????????????????????????????????????????????????
ND denotes ‘not determined’
IC denotes that a measurement was made but has not been reported here due to incorrect calibration of the Ultrameter.
Note 1: Ultrameter measurements made in August 2017, not at time of collection. Temperature recorded at time of measurement.
Note 2: Ultrameter measurements made in September 2017, not at time of collection.

## Sheet: Lab_data
Data S2:		Water samples - laboratory data
??????????????????????????????????????????????????????????????????????????????????????????????????????????????????????????????????????????????????????????????????????
							Anions (mg/l)									Cations (mg/l)
	??????????????????????????????????????????????????????
Sample	Source	Date	Time	t (hrs)	V (m3)		Cl-	SO4--	NO3-	CaCO3*	HCO3-	F-	NO2-	Br-		Ca++	Mg++	Na+	K+	NH4+	Li+
SK01	Injection source	2017-08-03	12:00:00	-	-		56	346.2	4	25	30	0.6	ND	2.9		99.3	33.7	50.5	14.4	5.8	ND
SK02	Injection source	2017-08-03	12:30:00	-	-		58	332	2.8	27	33	0.7	ND	ND		96.1	32.2	52	15	5.4	2.4
SK03	Injection source	2017-08-03	13:00:00	-	-		57.7	330.2	3.8	24	29	0.7	ND	3.1		93.9	31.2	53	14.3	5.8	2.4
SK04	Water supply	2017-08-04	11:00:00	-	-		102.6	48.6	4.2	220	268	1.3	ND	1.5		4.2	0.4	209	5.2	ND	2.4
SK05	Well PX-2	2017-03-29	17:20:00	-	-		734.94	145.82	0.33	150	183	1.61	ND	5.06		53.31	0.56	563.43	34.74	ND	1.51
SK06	Well PX-2	2017-04-10	17:45:00	-	-		135.95	223.74	2.47	130	159	1.17	ND	2.41		61.33	17.47	175.16	12.14	7.57	1.37
SK07	Well PX-2	2017-04-17	00:35:00	-	-		705.61	579.75	ND	40	49	1.02	ND	2.04		229.31	30.12	403.96	27.07	ND	1.42
SK08	Well PX-2	2017-05-03	19:15:00	-	-		2709.4	326	ND	50	61	1.52	ND	11.34		471.5	14.44	967.4	46.62	20.78	3.04
SK09	Well PX-1	2017-04-17	00:29:00	-	-		799.28	541.82	ND	220	268	4.3	ND	9.86		168.44	0	700.2	55.46	20.9	3.34
SK10	Well PX-1	2017-08-01	09:30:00	-	-		816.42	487.2	ND	130	159	5.78	ND	13.42		149.52	0.2	718.6	57.3	20.14	3.84
SK11	Well PX-1	2017-08-02	11:30:00	-	-		996.46	535.86	ND	170	207	5.94	ND	10.52		155.58	0.344	819.8	53.52	22.4	3.3
SK12	Well PX-1	2017-08-02	17:00:00	-	-		960.8	533.86	ND	90	110	3.74	ND	10.3		150.38	0.264	784.6	53.82	22.1	3.28
SK13	Well PX-1	2017-08-03	19:00:00	-	-		1139.18	513	ND	120	146	2.68	ND	8.96		208.58	0.31	788	52.3	21.38	3.3
SK14	Well PX-2	2017-03-17	12:55:00	-	-		979.8	152.68	ND	260	317	2.64	ND	9.44		66.12	0.56	729.4	58.88	ND	2.94
SK15	Well PX-2	2017-01-17	22:44:00	-	-		966.38	478.26	ND	90	110	2.44	ND	3.3		254	9.88	589	58.94	20.32	3.18
SK16	Well PX-2	2017-03-16	ND	-	-		4686.4	414.4	ND	60	73	2.5	ND	9.18		214.08	4.5	2386.8	78.4	0	2.74
SK17	Well PX-1	2016-12-23	08:00:00	-	-		67.2	404.8	0.44	50	61	0.82	ND	0.52		116.89	35.17	66.23	14.03	6.04	1.28
SK18	Well PX-1	2016-12-24	19:43:00	-	-		248.53	556.16	0.75	120	146	1.73	ND	3.27		147.27	11.25	307.64	25.37	10.39	1.44
SK19	Well PX-1	2017-03-20	17:20:00	-	-		962.5	519.2	ND	160	195	3.26	ND	10.42		209.3	0.14	736.2	54.44	21.64	3.2
SK20	Injection water	2017-08-07	11:30:00	-	-		162.7	363.4	1.9	42	51	0.7	ND	ND		111.6	35.5	120.3	21	7	1.4
SK21	Injection water	2017-08-07	12:30:00	-	-		63.1	355	3	29	35	0.7	ND	3.2		107.5	36.1	53.1	17.4	6.8	1.6
SK22	Well PX-1	2017-08-14	09:55:00	0.35	8.27561		147.4	321	0.36	100	122	0.79	ND	2.54		136.79	30.06	109.01	18.75	7.47	1.38
SK23	Well PX-1	2017-08-14	11:10:00	1.6	37.2312		63.27	340.9	3.49	60	73	0.78	ND	2.12		126.18	30.36	56.08	8.99	2.74	0.03
SK24	Well PX-1	2017-08-14	13:30:00	3.93	88.8548		102.5	376.6	3.53	70	85	0.9	ND	2.2		114.3	20.57	129.16	14.33	7.93	1.33
SK25	Well PX-1	2017-08-14	15:40:00	6.1	134.097		129.65	400.8	3.32	80	98	1.18	ND	0.78		108.89	12.77	169.9	18.13	8.95	1.4
SK26	Well PX-1	2017-08-14	17:40:00	8.1	173.683		190.55	450.7	4.09	100	122	2.31	ND	2.28		134.3	13.99	219.55	27.07	11.09	1.56
SK27	Well PX-1	2017-08-14	19:00:00	9.43	198.967		205	415.8	4.36	90	110	2.84	ND	2.14		131.71	9.16	219.25	22.47	11.36	1.55
SK28	Well PX-1	2017-08-14	21:00:00	11.43	235.313		245.9	437.1	3.55	110	134	2.54	ND	2.46		131.86	8.2	245.82	21.98	10.08	1.44
SK29	Well PX-1	2017-08-14	23:00:00	13.43	269.849		286.3	446.22	3.23	120	146	2.49	ND	2.8		137.39	7.47	268.97	23.09	10.27	1.5
SK30	Well PX-1	2017-08-15	01:00:00	15.43	302.672		323.1	450.9	3.27	130	159	2.96	ND	2.96		145.58	9.33	287.57	25.44	12.45	1.59
SK31	Well PX-1	2017-08-15	03:00:00	17.43	333.875		335.9	452.6	3.15	120	146	1.9	ND	3.93		143.08	7.55	292.61	24.18	10.61	1.51
SK32	Well PX-1	2017-08-15	05:00:00	19.43	363.544		390.6	474.7	4.61	130	159	2.4	ND	4.49		154.5	8.76	323.7	31.48	11.88	1.59
SK33	Well PX-1	2017-08-15	07:15:00	21.68	395.195		421	466.9	3.89	110	134	4.33	ND	5.69		155.39	7.92	332.9	26.97	13.35	1.62
SK34	Well PX-1	2017-08-15	10:00:00	24.43	431.557		466.9	483.2	3.84	100	122	4.51	ND	3.46		161.18	7.51	362.7	32.88	13.74	1.11
SK35	Well PX-1	2017-08-15	13:00:00	27.43	468.526		471.9	475.8	2.83	130	159	1.64	ND	3.5		164.18	7.15	363.08	32.86	12.25	1.64
SK36	Well PX-1	2017-08-15	16:00:00	30.43	502.914		499.1	474.9	2.74	110	134	4.05	ND	5.76		163.79	6.72	372.63	28.24	13.1	1.65
SK37	Well PX-1	2017-08-15	18:45:00	33.18	532.356		554.1	504.2	3.5	100	122	4.99	ND	6.1		175.73	6.81	410.8	30.51	13.4	1.12
SK38	Well PX-1	2017-08-16	09:30:00	47.93	662.567		627.6	495.1	3.41	90	110	6.36	ND	5.37		176.96	5.69	435.67	35.99	14.96	0.17
SK39	Well PX-1	2017-08-16	12:25:00	50.85	683.836		629.1	493	2.78	90	110	5.44	ND	6.25		176.87	5.42	434.55	31.56	13.86	1.7
SK40	Well PX-1	2017-08-16	19:00:00	57.43	727.643		663.9	499.4	1.56	110	134	4.37	ND	4.92		180.97	5.24	455.42	37.44	14.83	1.71
SK41	Well PX-1	2017-08-17	12:45:00	75.18	823.453		734.7	518.8	1.67	90	110	4.85	ND	4.19		189.24	4.84	494.1	39.42	15.3	1.77
SK42	Well PX-1	2017-08-17	18:00:00	80.43	847.046		736.9	511.38	ND	80	98	5.76	ND	6.99		182.66	4.56	495.3	35.65	13.17	1.78
SK43	Well PX-1	2017-08-18	09:07:00	95.55	905.897		776.85	518.5	ND	60	73	3.89	ND	5.39		186.16	2.87	514.38	36.46	12.46	1.69
SK44	Well PX-1	2017-08-18	18:06:00	104.53	935.422		820.3	515.84	ND	80	98	3.9	ND	7.88		195.67	4.39	519.63	64.6	12.47	1.77
SK45	Well PX-1	2017-08-19	10:10:00	120.6	979.877		796.13	515.47	ND	80	98	2.34	ND	4.31		188	3.81	530.7	37.64	13.36	1.79
SK46	Well PX-1	2017-08-20	16:50:00	151.27	1049.27		820.6	505.66	ND	70	85	3.77	ND	3.13		189.16	2.38	542.15	47.27	13.5	1.81
SK47	Well PX-1	2017-08-25	ND	~268	-		744.4	491.2	0.72	80	98	2.6	0	3.05		161.1	1.71	548.95	35.48	0	1.79
SK48	Well PX-1	2017-08-26	ND	~292	-		988.8	468.5	2.72	60	73	2.6	0	6.5		203.94	1.81	607.46	37.16	0	1.82
SK49	Well PX-1	2017-08-27	ND	~316	-		1003.1	475.3	0.53	50	61	4.7	0	8.23		198.52	1.65	621.2	37.9	0	1.85
SK50	Well PX-1	2017-08-31	ND	~412	-		886.7	489.1	1.18	70	85	2.9	0	4.28		174.93	1.51	606.19	37.9	0	1.86
SK51A	Well PX-1	2017-09-01	ND	~436	-		954.1	462	1.21	70	85	2.7	0	4.8		183.29	1.48	611.87	37.6	0	1.79
SK51B	Well PX-1	2017-09-01	ND	~436	-		954	462	0.39	70	85	2.7	0	6.02		190.52	3.25	613.38	42.22	0	1.9
SK51C	Well PX-1	2017-09-01	ND	~436	-		948.8	459.5	0.28	70	85	2.7	0	5.07		180.67	1.46	610.76	37.44	0	1.76
SK51D	Well PX-1	2017-09-01	ND	~436	-		953.4	460.8	0.41	70	85	2.7	0	4.34		190.85	3.21	613.74	41.88	0	1.88
SK51	Well PX-1	2017-09-01	ND	~436	-		951.9	460.74	0.52	70	85	2.7	0	4.87		185.29	2.18	612.1	39.32	0	1.82
SK52	Well PX-2	2017-08-27	ND	-	-		5657.5	111	2.5	120	146	4	0	26		995.5	4.5	1922	146.5	0	7.75
SK53	Well PX-2	2017-08-28	ND	-	-		5752.5	113	1	130	159	4	0	33		1027	4.65	1949	146.5	0	7.85
??????????????????????????????????????????????????????????????????????????????????????????????????????????????????????????????????????????????????????????????????????
Results of the laboratory analysis, carried out as described in the supplementary text
The parameter t indicates the time after the start of flowback (at 09:34 on August 14, 2017) following the August 2017 injection into well PX-1; it is not defined for the other samples.
The parameter V indicates the volume of water produced following the August 2017 injection into well PX-1, up to the time when a sample was collected; it is not defined for the other samples, including samples produced by pumping this well.
